# Supplementary material for: Small Tails Tell Tall Tales – Intra-Individual Variation in the Stable Isotope Values of Fish Fin
Source: PLoS One. 2015 Dec 15;10(12):e0145154. doi: 10.1371/journal.pone.0145154 (PMC4682899; doi:10.1371/journal.pone.0145154)
Supplement: S1 File — A data file containing all carbon (δ13C), nitrogen (δ15N), hydrogen (δ2H) and oxygen (δ18O) stable isotope ratios generated during this study. (XLSX) [file pone.0145154.s001.xlsx]

## Sheet: Codes
Sample ID	fishID_cassifier
classifier	T - tip
	M - mid
	B - base
	R - Ray
	F - membrane
LE - lipid extracted

## Sheet: CN
Species	Sample ID	Date	Sample wt (mg)	CO2 Ampl	N2 Ampl	d13C	d15N	%C	%N	C/N
Salmon	1251TJ06_TF	2015-04-08	1.002	3.431	3.601	-29.4824	7.9519	42.0205	12.0344	3.4917
Salmon	1251TJ06_TR	2015-04-08	1.091	2.639	3.025	-27.6684	7.79376	29.0824	9.24276	3.1465
Salmon	1251TJ06_MF	2015-04-08	0.988	2.749	2.947	-28.372	7.79984	33.6133	9.97204	3.37075
Salmon	1251TJ06_MR	2015-04-08	1.086	2.283	2.471	-27.1547	7.3011	25.1048	7.58431	3.3101
Salmon	1251TJ06_BF	2015-04-08	0.972	2.332	2.469	-28.0565	7.30414	28.7566	8.47705	3.39229
Salmon	1251TJ06_BR	2015-04-08	1.041	1.94	2.103	-26.9829	7.21291	22.2231	6.75731	3.28875
Salmon	1041TJ06_TF	2015-04-08	1.046	3.208	3.547	-27.3264	8.21647	37.3437	11.3356	3.29438
Salmon	1041TJ06_TR	2015-04-08	0.835	2.527	2.731	-27.239	8.36447	36.5742	10.938	3.34379
Salmon	1041TJ06_MF	2015-04-08	1.061	2.819	2.995	-27.2122	7.93669	32.0619	9.41473	3.40551
Salmon	1041TJ06_MR	2015-04-08	1.061	2.134	2.309	-25.9289	7.23825	23.9736	7.26384	3.30041
Salmon	1041TJ06_BF	2015-04-08	0.959	2.72	2.875	-27.0584	7.65894	34.2336	9.99859	3.42384
Salmon	1041TJ06_BR	2015-04-08	1.023	1.953	2.132	-25.7266	7.05883	22.7828	6.96401	3.27151
Salmon	506TJ06_TF	2015-04-08	0.846	2.749	2.967	-26.3148	9.28288	39.2491	11.7172	3.34971
Salmon	506TJ06_TR	2015-04-08	1.066	2.534	2.916	-25.3272	8.43949	28.5906	9.1358	3.12951
Salmon	506TJ06_MF	2015-04-08	0.916	2.733	2.851	-26.2353	8.23066	35.9955	10.3992	3.46138
Salmon	506TJ06_MR	2015-04-08	1.091	2.57	2.792	-25.59	7.93973	28.2915	8.53373	3.31525
Salmon	506TJ06_BF	2015-04-08	0.775	1.892	1.79	-26.1296	7.45417	29.1947	7.71591	3.7837
Salmon	506TJ06_BR	2015-04-08	1.04	1.874	1.927	-26.1449	7.32239	21.4628	6.19828	3.4627
Salmon	804TJ06_TF	2015-04-08	0.785	2.635	2.81	-27.8138	8.62398	40.3371	11.9146	3.38551
Salmon	804TJ06_TR	2015-04-08	0.829	2.523	2.741	-27.6551	8.73346	36.5448	11.0152	3.31768
Salmon	804TJ06_MF	2015-04-08	1.033	3.255	3.305	-28.3255	8.4851	38.3328	10.6593	3.59619
Salmon	804TJ06_MR	2015-04-08	1.061	2.734	2.93	-27.3819	8.2337	30.9958	9.19755	3.37
Salmon	804TJ06_BF	2015-04-08	0.921	2.962	2.903	-28.5751	8.2114	38.7638	10.4493	3.70972
Salmon	804TJ06_BR	2015-04-08	0.993	2.113	2.211	-26.7377	7.53425	25.3768	7.43678	3.41234
Salmon	618TJ06_TF	2015-04-08	0.933	2.935	3.133	-27.0359	8.23877	37.9468	11.1704	3.39709
Salmon	618TJ06_TR	2015-04-08	1.028	2.963	3.174	-26.8011	8.12828	34.8375	10.2672	3.39308
Salmon	618TJ06_MF	2015-04-08	0.999	2.737	2.778	-26.8627	7.68529	32.9744	9.24838	3.56542
Salmon	618TJ06_MR	2015-04-08	1.042	2.13	2.329	-25.5669	7.53121	24.3795	7.461	3.26759
Salmon	618TJ06_BF	2015-04-08	0.913	2.231	2.268	-26.3343	7.30718	29.1126	8.25736	3.52565
Salmon	618TJ06_BR	2015-04-08	0.982	2.213	2.295	-26.1749	7.45316	26.9129	7.80221	3.44939
Salmon	505TJ06_TF	2015-04-08	0.722	2.322	2.441	-27.4389	8.26006	38.4589	11.2493	3.41878
Salmon	505TJ06_TR	2015-04-08	0.799	2.127	2.38	-26.8298	8.06847	31.7575	9.92874	3.19854
Salmon	505TJ06_MF	2015-04-08	0.998	2.94	3.065	-28.1942	8.07861	35.5339	10.2189	3.47728
Salmon	505TJ06_MR	2015-04-08	1.051	2.536	2.758	-27.5221	7.61231	28.9732	8.75443	3.30955
Salmon	505TJ06_BF	2015-04-08	1.058	2.531	2.579	-28.2638	7.26461	28.6237	8.0949	3.53601
Salmon	505TJ06_BR	2015-04-08	1.063	2.102	2.099	-28.0129	7.03247	23.5704	6.5914	3.57594
Salmon	413TJ06_TF	2015-04-08	0.947	2.852	3.097	-25.5456	7.26562	36.3155	10.8833	3.33682
Salmon	413TJ06_TR	2015-04-08	1.103	3.175	3.548	-25.2147	7.10343	34.8999	10.6962	3.26283
Salmon	416TJ06_MF	2015-04-08	0.968	2.946	3.171	-25.5814	6.82973	36.7504	10.8974	3.3724
Salmon	416TJ06_MR	2015-04-08	1.091	2.479	2.826	-24.8442	6.43641	27.1934	8.63313	3.14988
Salmon	416TJ06_BF	2015-04-08	0.978	2.246	2.387	-25.3211	6.22455	27.5741	8.16612	3.37664
Salmon	416TJ06_BR	2015-04-08	1.024	1.961	2.13	-24.6116	6.12825	22.8045	6.95338	3.27962
Salmon	1355TJ06_TF	2015-04-08	0.948	2.945	3.224	-27.3676	8.2925	37.4476	11.2951	3.31537
Salmon	1355TJ06_TR	2015-04-08	1.006	2.774	3.004	-26.7627	8.55708	33.1643	9.92336	3.34204
Salmon	1355TJ06_MF	2015-04-08	0.963	2.871	3.035	-27.4466	8.58546	36.0095	10.4845	3.43454
Salmon	1355TJ06_MR	2015-04-08	1.056	2.455	2.693	-26.2255	8.13943	27.7722	8.47179	3.2782
Salmon	1355TJ06_BF	2015-04-08	0.959	2.27	2.358	-27.0329	7.96305	28.4388	8.21797	3.46056
Salmon	1355TJ06_BR	2015-04-08	1.038	2.25	2.317	-26.7847	7.85255	25.8499	7.44677	3.47129
Salmon	1409TJ06_TF	2015-04-08	0.651	2.352	2.552	-29.2501	7.50688	43.2154	13.0414	3.31372
Salmon	1409TJ06_TR	2015-04-08	0.69	2.223	2.399	-29.3708	7.82721	38.4701	11.5513	3.33037
Salmon	1409TJ06_MF	2015-04-08	0.904	2.524	2.751	-28.651	7.64779	33.4049	10.1034	3.3063
Salmon	1409TJ06_MR	2015-04-08	1.002	2.535	2.791	-28.2522	7.63866	30.2885	9.25859	3.2714
Salmon	1409TJ06_BF	2015-04-08	1.05	3.03	3.249	-28.8732	7.70151	34.8525	10.2642	3.39554
Salmon	1409TJ06_BR	2015-04-08	1.001	2.302	2.428	-27.7107	7.59001	27.3938	8.05503	3.40083
Salmon	1487TJ06_TF	2015-04-08	0.866	2.475	2.742	-26.9568	7.74612	34.2242	10.5296	3.2503
Salmon	1487TJ06_TR	2015-04-08	0.826	2.199	2.435	-26.7161	7.75321	31.7396	9.79344	3.2409
Salmon	1487TJ06_MF	2015-04-08	1.046	2.306	2.553	-26.9054	7.40855	26.3413	8.1175	3.245
Salmon	1487TJ06_MR	2015-04-08	1.079	2.685	2.959	-26.8581	7.51905	29.8891	9.12053	3.27712
Salmon	1487TJ06_BF	2015-04-08	1.015	2.614	2.767	-27.4185	7.38727	30.8587	9.05357	3.40845
Salmon	1487TJ06_BR	2015-04-08	0.99	2.095	2.272	-26.6807	7.1237	25.1618	7.62814	3.29855
Salmon	1487TJ06_BR	2015-04-08	1.034	2.217	2.395	-26.7852	7.10444	25.4864	7.69485	3.31214
Salmon	518TJ06_TF	2015-04-08	0.981	2.926	3.264	-28.2188	8.44151	35.7296	10.9773	3.25485
Salmon	518TJ06_TR	2015-04-08	1.025	2.83	3.134	-27.845	8.23675	33.2323	10.1496	3.27426
Salmon	518TJ06_MF	2015-04-08	0.858	2.57	2.841	-28.5955	7.90425	35.8941	10.9973	3.26391
Salmon	518TJ06_MR	2015-04-08	0.979	2.477	2.718	-27.7269	7.79579	30.2333	9.22851	3.27608
Salmon	518TJ06_BF	2015-04-08	0.93	2.761	2.887	-28.622	7.84242	35.7498	10.3332	3.4597
Salmon	518TJ06_BR	2015-04-08	0.949	1.949	2.006	-28.0688	7.31732	24.444	7.03795	3.47317
Salmon	1321TJ06_TF	2015-04-08	1.015	2.828	3.155	-25.179	9.68228	33.533	10.3206	3.24914
Salmon	1321TJ06_TR	2015-04-08	0.923	2.347	2.647	-24.5056	9.90226	30.3417	9.53122	3.1834
Salmon	1321TJ06_MF	2015-04-08	0.93	2.602	2.794	-25.5476	9.21598	33.6547	9.99682	3.36654
Salmon	1321TJ06_MR	2015-04-08	0.99	2.39	2.613	-24.8335	9.51299	29.0316	8.82135	3.29106
Salmon	1321TJ06_BF	2015-04-08	0.788	2.113	2.239	-25.398	9.17746	31.9179	9.44635	3.37886
Salmon	1321TJ06_BR	2015-04-08	0.995	1.914	2.028	-24.4919	8.94025	22.9523	6.79673	3.37696
Salmon	983TJ06_T	2015-05-04	0.931	2.244	2.429	-25.8382	8.7962	30.5072	9.56512	3.18942
Salmon	983TJ06_M	2015-05-04	0.93	1.529	1.638	-24.8192	7.44912	20.62	6.53089	3.1573
Salmon	983TJ06_B	2015-05-04	0.997	2.264	2.45	-25.7759	8.48768	28.7262	9.01693	3.18581
Salmon	933TJ06_T	2015-05-04	0.95	2.546	2.74	-29.8879	10.5242	33.9228	10.5197	3.22469
Salmon	933TJ06_M	2015-05-04	0.951	2.073	2.237	-29.1785	9.76285	27.4858	8.6481	3.17825
Salmon	933TJ06_B	2015-05-04	1.032	2.073	2.161	-28.9668	9.34352	25.3653	7.72436	3.28381
Salmon	989TJ06_T	2015-05-04	1.03	2.885	3.111	-26.4766	9.18971	35.6337	10.9657	3.24955
Salmon	989TJ06_M	2015-05-04	1.021	2.34	2.488	-26.1615	9.05006	28.9607	8.92027	3.24662
Salmon	989TJ06_B	2015-05-04	1.058	2.222	2.305	-26.1682	8.60092	26.4492	7.98254	3.31338
Salmon	902TJ06_T	2015-05-04	0.936	2.33	2.485	-26.3776	8.7747	31.4442	9.7278	3.2324
Salmon	902TJ06_M	2015-05-04	0.946	2.121	2.245	-26.183	8.26934	28.1922	8.67745	3.24891
Salmon	902TJ06_B	2015-05-04	0.937	1.664	1.713	-25.8249	7.4653	22.292	6.78515	3.28541
Salmon	982TJ06_T	2015-05-04	0.938	2.509	2.685	-26.0666	8.2321	33.7761	10.4208	3.24121
Salmon	982TJ06_M	2015-05-04	0.944	2.148	2.303	-25.1379	8.07015	28.6315	8.94474	3.20093
Salmon	982TJ06_B	2015-05-04	0.939	1.63	1.708	-24.6396	7.44451	21.6921	6.70574	3.23485
Salmon	993TJ06_T	2015-05-04	0.976	2.509	2.698	-29.8208	10.5127	32.4751	10.0679	3.22561
Salmon	993TJ06_T	2015-05-04	0.966	2.495	2.724	-26.2577	9.68616	32.1202	9.96751	3.22249
Salmon	993TJ06_M	2015-05-04	1.013	2.205	2.375	-25.9066	9.18886	27.2674	8.58829	3.17495
Salmon	993TJ06_M	2015-05-04	1	2.031	2.132	-26.0251	9.06649	25.5646	7.84925	3.25695
Salmon	993TJ06_B	2015-05-04	1.049	1.66	1.746	-25.1315	8.21137	19.7291	6.13158	3.21761
Salmon	943TJ06_T	2015-05-04	0.989	2.578	2.801	-26.2651	9.12761	33.062	10.4062	3.17715
Salmon	943TJ06_M	2015-05-04	1.044	2.128	2.315	-25.609	8.53888	25.5787	8.15232	3.1376
Salmon	943TJ06_B	2015-05-04	1.048	1.851	1.917	-25.6801	8.2405	22.1154	6.76165	3.2707
Salmon	1295TJ06_T	2015-05-04	0.982	2.316	2.553	-26.6074	9.23405	29.6366	9.48955	3.12308
Salmon	1295TJ06_M	2015-05-04	1.007	2.165	2.407	-26.4528	8.81652	26.9131	8.71268	3.08896
Salmon	1295TJ06_B	2015-05-04	0.973	1.393	1.484	-24.8308	7.83859	17.9005	5.73064	3.12365
Salmon	1218TJ06_T	2015-05-04	1.088	2.463	2.739	-26.5279	8.51589	28.465	9.16958	3.10429
Salmon	1218TJ06_M	2015-05-04	0.989	1.858	2.051	-26.5457	7.80619	23.5046	7.64402	3.0749
Salmon	1218TJ06_B	2015-05-04	1.022	1.534	1.638	-25.9655	7.25247	18.729	5.9774	3.1333
Salmon	1245TJ06_T	2015-05-04	1.078	2.425	2.719	-28.2264	8.81431	28.393	9.21808	3.08014
Salmon	1245TJ06_M	2015-05-04	1.02	1.754	1.917	-27.4004	8.1217	21.4928	6.97415	3.08178
Salmon	1245TJ06_B	2015-05-04	0.995	1.554	1.653	-26.9264	7.83002	19.4212	6.18205	3.14154
Salmon	1243TJ06_T	2015-05-04	1.061	2.739	3.023	-28.1591	8.03924	32.5334	10.3428	3.1455
Salmon	1243TJ06_M	2015-05-04	1.008	1.985	2.201	-26.8415	7.79086	24.5676	7.99424	3.07316
Salmon	1243TJ06_B	2015-05-04	0.966	1.528	1.638	-26.3495	7.44717	19.6508	6.27003	3.13408
Salmon	1285TJ06_T	2015-05-04	0.99	2.596	2.86	-28.45	7.93405	33.0816	10.5123	3.14694
Salmon	1285TJ06_M	2015-05-04	0.976	1.979	2.204	-26.8748	7.78677	25.3972	8.29017	3.06353
Salmon	1285TJ06_B	2015-05-04	0.999	1.826	1.974	-26.4532	7.5314	22.9214	7.36099	3.1139
Salmon	1275TJ06_T	2015-05-04	0.955	2.792	3.051	-28.6439	8.4131	36.8366	11.5986	3.17595
Salmon	1275TJ06_M	2015-05-04	1.018	2.122	2.352	-27.5057	8.36796	26.0738	8.47375	3.077
Salmon	1275TJ06_B	2015-05-04	0.991	1.6	1.698	-26.7582	7.80354	20.2312	6.40727	3.15754
Salmon	1275TJ06_B	2015-05-04	1.005	1.929	2.13	-27.3466	8.0418	23.9044	7.82819	3.05363
Salmon	1288TJ06_T	2015-05-04	0.982	2.521	2.785	-26.33	9.02027	32.1911	10.3279	3.11691
Salmon	1288TJ06_M	2015-05-04	0.987	1.894	2.135	-25.5779	8.46486	23.9422	7.95971	3.00793
Salmon	1288TJ06_B	2015-05-04	0.969	1.589	1.69	-25.5802	8.15285	20.449	6.51032	3.14101
Salmon	1075TJ06_T	2015-05-04	1.013	2.597	2.9	-27.0345	9.05704	32.2547	10.4249	3.09402
Salmon	1075TJ06_M	2015-05-04	1.01	1.966	2.184	-26.3275	8.50814	24.4639	7.99899	3.05837
Salmon	1075TJ06_B	2015-05-04	0.994	1.638	1.796	-25.9248	7.79868	20.4833	6.70601	3.05447
Salmon	1091TJ06_T	2015-05-04	1.055	2.677	3.008	-27.8815	8.93012	32.1198	10.4253	3.08094
Salmon	1091TJ06_M	2015-05-04	0.946	2.152	2.423	-27.2184	8.69853	28.4334	9.37286	3.03359
Salmon	1091TJ06_B	2015-05-04	0.975	1.811	1.991	-26.6019	8.45523	23.1491	7.55429	3.06436
Salmon	1093TJ06_T	2015-05-04	1.034	2.807	3.16	-27.8819	8.9935	34.3506	11.1535	3.0798
Salmon	1093TJ06_M	2015-05-04	0.964	2.117	2.356	-27.2778	8.78478	27.4616	9.02856	3.04163
Salmon	1093TJ06_B	2015-05-04	1.061	1.869	2.064	-26.5196	8.12924	21.9453	7.19746	3.04904
Salmon	1065TJ06_T	2015-05-04	0.915	2.589	2.851	-26.6367	9.07139	35.6243	11.3884	3.12811
Salmon	1065TJ06_M	2015-05-04	0.95	2.172	2.421	-26.0047	8.75323	28.77	9.39958	3.06078
Salmon	1065TJ06_B	2015-05-04	1.031	2.093	2.307	-25.6158	8.61661	25.5207	8.28787	3.07928
Salmon	1087TJ06_T	2015-05-04	0.964	2.365	2.583	-28.555	8.5331	30.8512	9.88098	3.12228
Salmon	1087TJ06_M	2015-05-04	0.959	2.005	2.218	-27.8105	8.53182	26.0719	8.52656	3.05772
Salmon	1087TJ06_B	2015-05-04	0.995	1.651	1.792	-27.248	8.09897	20.6542	6.70637	3.07979
Salmon	1087TJ06_B	2015-05-04	0.968	1.548	1.714	-26.9758	7.80134	19.8828	6.63606	2.99617
Salmon	1017TJ06_T	2015-05-04	0.975	2.548	2.854	-26.8441	8.25709	32.908	10.7543	3.05999
Salmon	1017TJ06_M	2015-05-04	0.969	1.967	2.149	-26.3483	7.6265	25.3579	8.21644	3.08624
Salmon	1017TJ06_B	2015-05-04	1.014	1.569	1.69	-25.4419	7.10022	19.2388	6.23986	3.08321
Salmon	1405TJ06_T	2015-05-04	1.007	2.659	2.956	-26.9733	8.43371	33.2714	10.7623	3.09147
Salmon	1405TJ06_M	2015-05-04	0.955	2.094	2.31	-26.5321	8.32742	27.3959	8.8946	3.08006
Salmon	1405TJ06_B	2015-05-04	0.95	1.862	1.969	-26.4997	7.98845	24.4501	7.70175	3.17462
Salmon	1486TJ06_T	2015-05-04	0.989	2.557	2.837	-26.4553	8.75796	32.6226	10.5917	3.08001
Salmon	1486TJ06_M	2015-05-04	1.037	2.197	2.47	-25.5008	8.61696	26.5534	8.81717	3.01156
Salmon	1486TJ06_B	2015-05-04	0.972	1.996	2.221	-25.3678	8.57557	25.6852	8.46971	3.03259
Salmon	1460TJ06_T	2015-05-04	0.915	2.398	2.6	-27.317	8.62762	32.9865	10.513	3.13769
Salmon	1460TJ06_M	2015-05-04	1.055	2.27	2.47	-26.2511	8.90132	27.0675	8.66022	3.1255
Salmon	1460TJ06_B	2015-05-04	0.964	1.536	1.642	-25.2878	8.41065	19.8689	6.39557	3.10667
Salmon	1419TJ06T	2015-03-24	0.966	2.701	3.319	-26.324	7.7202	33.6389	11.4324	2.94242
Salmon	1419TJ06M	2015-03-24	0.997	2.37	2.946	-26.0959	7.33671	28.4003	9.82827	2.88966
Salmon	1419TJ06B	2015-03-24	0.935	1.607	1.873	-25.3061	6.15584	20.5548	6.68504	3.07475
Salmon	1442TJ06T	2015-03-24	0.99	2.858	3.534	-27.906	7.49295	34.8071	11.8766	2.93072
Salmon	1442TJ06M	2015-03-24	0.99	2.052	2.541	-26.1742	7.13483	24.8453	8.56203	2.9018
Salmon	1442TJ06B	2015-03-24	0.971	1.71	2.033	-25.5352	6.76251	21.0837	7.01579	3.00517
Salmon	1442TJ06B	2015-03-24	0.994	1.802	2.161	-25.6885	6.98265	21.5828	7.23909	2.98143
Salmon	1428TJ06T	2015-03-24	0.971	2.719	3.229	-28.1595	7.9931	33.7185	11.0852	3.04175
Salmon	1428TJ06M	2015-03-24	1.064	2.39	2.928	-26.6674	7.7415	26.9228	9.16996	2.93598
Salmon	1428TJ06B	2015-03-24	0.987	1.973	2.321	-26.4236	7.78614	23.803	7.81661	3.04519
Salmon	1488TJ06T	2015-03-24	0.968	2.473	3.099	-25.7957	8.26803	30.6523	10.6482	2.87862
Salmon	1488TJ06M	2015-03-24	0.992	2.278	2.83	-25.6308	8.00223	27.4872	9.50762	2.89108
Salmon	1488TJ06B	2015-03-24	1.072	2.159	2.563	-25.4304	7.46758	23.9549	7.96244	3.00849
Salmon	1357TJ06T	2015-03-24	0.958	2.602	3.201	-27.0494	7.8815	32.6763	11.128	2.93641
Salmon	1357TJ06M	2015-03-24	0.955	2.242	2.766	-26.4144	7.81049	28.135	9.65685	2.91348
Salmon	1357TJ06B	2015-03-24	1.055	1.924	2.336	-25.8359	7.14295	21.7509	7.36831	2.95196
Salmon	1373TJ06T	2015-03-24	0.977	2.9	3.409	-27.8624	7.88353	35.7512	11.5852	3.08595
Salmon	1373TJ06M	2015-03-24	1.01	2.34	2.928	-27.7389	7.91092	27.6759	9.6221	2.87628
Salmon	1373TJ06B	2015-03-24	1.013	1.812	2.22	-26.8939	7.19874	21.3701	7.32091	2.91904
Salmon	1385TJ06T	2015-03-24	0.932	2.712	3.351	-27.5936	8.02657	35.0628	11.9472	2.93481
Salmon	1385TJ06M	2015-03-24	1.004	2.48	2.947	-26.5897	8.12701	29.7246	9.77536	3.04077
Salmon	1385TJ06B	2015-03-24	0.974	1.945	2.232	-26.7156	7.55788	23.8402	7.63831	3.12113
Salmon	1395TJ06T	2015-03-24	0.981	2.682	3.309	-25.9797	8.67484	32.9159	11.2056	2.93745
Salmon	1395TJ06M	2015-03-24	1.02	2.424	2.935	-25.072	8.91122	28.4619	9.54628	2.98146
Salmon	1395TJ06B	2015-03-24	1.044	2.176	2.663	-25.3387	8.43948	24.9488	8.49801	2.93584
Salmon	252TJ06-T	2014-09-09	1.181	2.724	3.721	-26.3472	9.23981	35.3093	10.2195	3.4551
Salmon	252TJ06-M	2014-09-09	1.037	2.026	2.616	-26.6851	8.69015	29.7707	8.23348	3.61581
Salmon	252TJ06-B	2014-09-09	1.157	1.466	1.944	-25.4775	8.04421	19.2221	5.5015	3.49397
Salmon	240TJ06-T	2014-09-09	1.272	2.861	3.925	-27.5915	8.95244	34.3984	9.96306	3.4526
Salmon	240TJ06-M	2014-09-09	1.033	2.247	2.733	-28.1069	8.81377	33.1193	8.61602	3.84393
Salmon	240TJ06-B	2014-09-09	1.199	1.726	2.214	-26.8984	8.14299	21.8646	6.03963	3.62019
Salmon	538TJ06-T	2014-09-09	1.096	2.656	3.538	-27.131	10.2433	36.974	10.4484	3.53871
Salmon	538TJ06-M	2014-09-09	1.024	1.872	2.48	-26.4997	9.23677	27.7118	7.87997	3.51674
Salmon	538TJ06-B	2014-09-09	1.199	1.759	2.221	-26.2709	8.3538	22.2573	6.04167	3.68397
Salmon	526TJ06-T	2014-09-09	1.104	2.897	3.839	-27.7054	9.02127	40.2117	11.2636	3.57005
Salmon	526TJ06-M	2014-09-09	1.242	2.354	3.137	-27.2333	8.10121	28.8607	8.20036	3.51944
Salmon	526TJ06-B	2014-09-09	1.115	1.694	2.155	-27.0914	7.65075	23.0964	6.33334	3.6468
Salmon	751TJ06-T	2014-09-09	1.18	3.126	4.168	-28.1224	9.48441	40.6271	11.3899	3.56694
Salmon	751TJ06-M	2014-09-09	1.177	2.199	3.054	-27.4785	8.79049	28.3868	8.41622	3.37287
Salmon	751TJ06-B	2014-09-09	1.016	1.621	2.178	-27.2082	8.59306	24.287	7.0505	3.44472
Salmon	765TJ06-T	2014-09-09	1.021	2.667	3.583	-26.6213	8.1832	39.9397	11.3782	3.51021
Salmon	765TJ06-M	2014-09-09	1.016	1.96	2.519	-26.3009	6.5865	29.4497	8.1149	3.62908
Salmon	765TJ06-B	2014-09-09	1.064	1.555	2.111	-25.3192	6.10268	22.1328	6.50614	3.40183
Salmon	616TJ06-T	2014-09-09	1.24	2.773	3.721	-26.3607	9.19729	34.1767	9.69175	3.52637
Salmon	616TJ06-M	2014-09-09	1.076	2.147	2.75	-26.6136	8.89845	30.2906	8.27964	3.65844
Salmon	616TJ06-B	2014-09-09	1.053	2.053	2.551	-26.7024	8.5799	29.5503	7.87212	3.75379
Salmon	663TJ06-T	2014-09-09	1.028	2.476	3.276	-26.5827	8.96889	36.7646	10.3179	3.56317
Salmon	663TJ06-M	2014-09-09	1.07	2.197	2.896	-26.4312	8.70729	31.2065	8.7679	3.55917
Salmon	663TJ06-B	2014-09-09	1.013	1.598	1.973	-26.3569	7.72281	24.049	6.4013	3.75689
Salmon	603TJ06-T	2014-09-09	1.039	2.581	3.458	-25.7719	10.2514	37.904	10.7803	3.51605
Salmon	603TJ06-M	2014-09-09	1.23	1.959	2.694	-24.5807	8.679	24.1595	7.14062	3.38339
Salmon	603TJ06-B	2014-09-09	1.032	1.517	1.944	-24.8153	8.55814	22.2405	6.16059	3.61012
Salmon	26TJ06-T	2014-09-09	1.017	2.483	3.276	-26.8009	9.58836	37.2602	10.4564	3.56338
Salmon	26TJ06-M	2014-09-09	1.049	2.098	2.752	-26.5818	9.0433	30.368	8.50583	3.57026
Salmon	26TJ06-B	2014-09-09	1.085	1.764	2.326	-25.9225	8.13939	24.6736	6.99793	3.52585
Salmon	82TJ06-T	2014-09-09	1.21	2.948	3.993	-27.717	8.22096	37.2443	10.6227	3.5061
Salmon	82TJ06-M	2014-09-09	1.064	2.189	2.866	-27.4949	7.64362	31.2588	8.73108	3.58018
Salmon	82TJ06-B	2014-09-09	1.158	1.68	2.32	-26.2082	6.66714	21.9949	6.55389	3.356
Salmon	383TJ06-T	2014-09-09	1.031	2.638	3.566	-27.1272	10.1688	38.978	11.1586	3.4931
Salmon	383TJ06-M	2014-09-09	1.228	2.194	3.049	-26.2902	8.83299	27.1536	8.05507	3.371
Salmon	383TJ06-B	2014-09-09	1.098	1.661	2.069	-26.6378	8.22179	22.896	6.14548	3.72566
Salmon	387TJ06-T	2014-09-09	1.071	2.721	3.677	-27.4196	9.9137	38.7626	11.0762	3.49962
Salmon	387TJ06-M	2014-09-09	1.274	2.289	3.076	-26.9225	8.5134	27.3099	7.81197	3.4959
Salmon	387TJ06-B	2014-09-09	1.046	1.704	2.174	-26.9862	8.27344	24.6977	6.77461	3.64562
Salmon	440TJ06-T	2014-09-09	0.977	2.387	3.206	-26.8414	8.61763	37.1534	10.6157	3.49985
Salmon	440TJ06-M	2014-09-09	1.163	2.334	3.09	-26.7671	8.05214	30.54	8.60245	3.55015
Salmon	440TJ06-B	2014-09-09	1.066	1.889	2.459	-26.5876	7.45479	26.8994	7.51481	3.57952
Salmon	442TJ06-T	2014-09-09	1.026	2.7	3.611	-27.41	9.19298	40.1684	11.3756	3.53109
Salmon	442TJ06-M	2014-09-09	1.031	2.011	2.758	-26.769	8.35938	29.5724	8.66608	3.41243
Salmon	442TJ06-B	2014-09-09	1.088	1.454	1.978	-25.713	7.23837	20.2418	5.96561	3.39309
Salmon	472TJ06-T	2014-09-09	1.175	2.874	3.9	-26.659	9.59713	37.3696	10.6793	3.49926
Salmon	472TJ06-M	2014-09-09	1.209	2.374	3.199	-26.2999	8.94693	29.8513	8.55209	3.49053
Salmon	472TJ06-B	2014-09-09	1.028	1.461	1.921	-25.6782	8.0316	21.5277	6.1094	3.5237
Salmon	883TJ06-T	2014-09-09	1.062	2.548	3.445	-26.3096	7.9589	36.4681	10.4422	3.49237
Salmon	883TJ06-M	2014-09-09	1.048	1.691	2.333	-25.4765	6.57364	24.4505	7.24861	3.37313
Salmon	883TJ06-B	2014-09-09	1.139	1.545	2.087	-25.2825	6.19572	20.5717	5.98938	3.43469
Salmon	816TJ06-T	2014-09-09	1.099	2.632	3.591	-24.7767	8.43275	36.4693	10.5182	3.46724
Salmon	816TJ06-M	2014-09-09	1.168	2.168	2.874	-24.7303	7.31592	28.1195	7.9592	3.53295
Salmon	816TJ06-B	2014-09-09	1.118	1.666	2.212	-24.2052	6.81923	22.5457	6.46897	3.48521
Salmon	190TJ06-T	2014-09-09	1.089	2.517	3.432	-26.3298	9.75934	35.1656	10.1515	3.46408
Salmon	190TJ06-M	2014-09-09	1.024	2.071	2.729	-26.6677	9.17722	30.7116	8.64274	3.55346
Salmon	190TJ06-B	2014-09-09	1.147	1.694	2.295	-25.852	8.51044	22.4023	6.52606	3.43274
Salmon	152TJ06-T	2014-09-09	1.175	2.93	3.961	-26.7198	10.7272	38.1645	10.8594	3.5144
Salmon	152TJ06-M	2014-09-09	1.133	2.155	2.898	-26.2005	9.53026	28.888	8.29586	3.48221
Salmon	152TJ06-B	2014-09-09	1.217	1.895	2.582	-25.6937	8.99903	23.6106	6.91385	3.41497
Salmon	1413TJ06-T	2014-09-09	1.169	2.804	3.813	-27.9786	8.16053	36.6079	10.4933	3.48867
Salmon	1413TJ06-M	2014-09-09	1.066	1.989	2.431	-27.9467	7.61405	28.2849	7.40722	3.81856
Salmon	1413TJ06-B	2014-09-09	1.071	1.748	2.363	-26.8936	7.18604	24.7689	7.19332	3.44331
Salmon	1474TJ06-T	2014-09-09	1.061	2.291	3.16	-27.8202	7.8419	32.7653	9.6159	3.40741
Salmon	1474TJ06-M	2014-09-09	1.083	2.105	2.831	-27.605	7.83358	29.4869	8.46252	3.48441
Salmon	1474TJ06-B	2014-09-09	1.269	1.752	2.489	-26.2063	7.31884	20.8838	6.36453	3.28128
Salmon	1011TJ06-T	2014-09-09	1.068	2.532	3.391	-27.4167	8.80823	36.0512	10.2242	3.52606
Salmon	1011TJ06-M	2014-09-09	1.223	2.432	3.204	-26.8096	8.71708	30.2127	8.46517	3.56906
Salmon	1011TJ06-B	2014-09-09	1.229	2.608	3.142	-27.493	8.58124	32.3681	8.26384	3.91683
Salmon	1019TJ06-T	2014-09-09	1.103	2.667	3.586	-27.0847	9.34208	36.8862	10.4902	3.51626
Salmon	1019TJ06-M	2014-09-09	1.009	1.549	2.109	-25.9775	8.49951	23.9182	6.94661	3.44315
Salmon	1019TJ06-B	2014-09-09	1.049	1.407	1.891	-25.4775	8.30005	20.6422	5.94315	3.47329
Salmon	904TJ06-T	2014-09-10	1.022	2.541	3.408	-27.1259	8.25983	38.1128	10.9267	3.48804
Salmon	904TJ06-M	2014-09-10	1.13	2.187	2.974	-26.6886	7.65013	29.5924	8.65281	3.41998
Salmon	904TJ06-B	2014-09-10	1.184	1.635	2.236	-25.8071	6.79262	21.0084	6.23042	3.3719
Salmon	980TJ06-T	2014-09-10	1.051	2.572	3.439	-27.9445	8.08782	37.4949	10.7183	3.49821
Salmon	980TJ06-M	2014-09-10	1.191	2.318	3.114	-27.0707	8.15812	29.9725	8.62417	3.4754
Salmon	980TJ06-B	2014-09-10	1.089	1.577	2.112	-26.1552	7.50004	22.0473	6.4359	3.42567
Salmon	1210TJ06-T	2014-09-10	1.207	2.767	3.779	-29.3504	7.593	35.4717	10.3133	3.43942
Salmon	1210TJ06-M	2014-09-10	1.1	1.935	2.664	-28.1812	7.47583	26.8203	7.99067	3.35645
Salmon	1210TJ06-B	2014-09-10	1.183	1.64	2.202	-27.6531	6.915	21.0833	6.14704	3.42982
Salmon	1214TJ06-T	2014-09-10	1.013	2.485	3.315	-28.959	7.91489	37.5389	10.7468	3.49302
Salmon	1214TJ06-M	2014-09-10	1.247	2.322	3.202	-27.4808	8.06477	28.4153	8.43238	3.36978
Salmon	1214TJ06-B	2014-09-10	1.104	1.664	2.277	-26.7577	7.44883	23.0529	6.84423	3.36823
Salmon	1377TJ06-T	2014-09-10	1.031	2.493	3.387	-27.5206	7.99998	36.9401	10.769	3.43024
Salmon	1377TJ06-M	2014-09-10	1.268	2.373	3.233	-26.9661	7.61231	28.5862	8.38001	3.41124
Salmon	1377TJ06-B	2014-09-10	1.122	1.632	2.129	-26.6886	6.89066	22.113	6.2862	3.51771
Salmon	1369TJ06-T	2014-09-10	1.069	2.45	3.29	-28.1989	8.26804	35.0238	10.0826	3.4737
Salmon	1369TJ06-M	2014-09-10	1.074	2.285	2.899	-28.4039	8.34279	32.4264	8.84357	3.66667
Salmon	1369TJ06-B	2014-09-10	1.144	1.654	2.221	-27.0641	7.9919	21.9594	6.39272	3.43507
Salmon	1115TJ06-T	2014-09-10	1.031	2.433	3.276	-29.2261	8.66795	36.0538	10.4167	3.46117
Salmon	1115TJ06-M	2014-09-10	1.091	2.115	2.88	-28.9987	8.89841	29.4618	8.63597	3.41152
Salmon	1115TJ06-B	2014-09-10	1.044	1.574	2.145	-28.1122	8.04099	22.9236	6.81098	3.36568
Salmon	1156TJ06-T	2014-09-10	1.01	2.516	3.349	-29.2911	8.1286	38.1058	10.8832	3.50132
Salmon	1156TJ06-M	2014-09-10	1.059	2.046	2.753	-28.2134	8.22251	29.4604	8.57703	3.4348
Salmon	1156TJ06-B	2014-09-10	1.041	1.841	2.32	-28.3616	8.04513	26.8369	7.33463	3.65893
Sea Trout	222TJ06-T	2014-09-10	1.039	2.599	3.581	-28.0593	11.3369	38.2971	11.2887	3.39251
Sea Trout	222TJ06-M	2014-09-10	1.038	2.083	2.954	-27.8847	10.3667	30.7005	9.37445	3.27491
Sea Trout	222TJ06-B	2014-09-10	1.224	1.822	2.546	-27.4722	9.51751	22.5703	6.83549	3.30193
Sea Trout	277TJ06-T	2014-09-10	1.039	2.524	3.43	-29.2582	10.8474	37.0514	10.7872	3.43475
Sea Trout	277TJ06-M	2014-09-10	1.162	2.115	3.041	-28.3342	9.48491	27.6685	8.57105	3.22813
Sea Trout	277TJ06-B	2014-09-10	1.044	1.778	2.3	-29.3664	9.4092	25.8144	7.24298	3.56405
Sea Trout	114TJ06-T	2014-09-10	1.053	2.762	3.66	-28.94	9.53446	40.1735	11.3531	3.53854
Sea Trout	114TJ06-M	2014-09-10	1.137	2.321	3.124	-29.0288	8.97637	31.2909	9.03872	3.46188
Sea Trout	114TJ06-B	2014-09-10	1.276	2.103	2.803	-28.9025	8.4429	25.0926	7.23088	3.4702
Sea Trout	100TJ06-T	2014-09-10	1.064	2.72	3.612	-27.4777	10.4597	39.1441	11.1262	3.5182
Sea Trout	100TJ06-M	2014-09-10	1.121	2.392	3.224	-27.4587	10.3124	32.5053	9.39554	3.45965
Sea Trout	100TJ06-B	2014-09-10	1.054	1.643	2.083	-26.9325	9.25541	23.6682	6.55137	3.61271
Sea Trout	288TJ06-T	2014-09-10	1.193	2.597	3.624	-28.6776	9.41491	33.2762	9.95742	3.34185
Sea Trout	288TJ06-M	2014-09-10	1.216	2.306	3.133	-28.2585	8.60514	29.1205	8.51495	3.41992
Sea Trout	288TJ06-B	2014-09-10	1.08	1.551	2.142	-27.5729	8.41438	21.7748	6.53774	3.33063
Sea Trout	73TJ06-T	2014-09-10	1.001	2.623	3.477	-32.8933	7.96794	40.0687	11.3459	3.53155
Sea Trout	73TJ06-M	2014-09-10	1.178	1.88	2.53	-29.8598	7.06591	24.2221	7.06516	3.42838
Sea Trout	73TJ06-B	2014-09-10	1.11	1.783	2.305	-30.1707	7.25944	24.3489	6.84119	3.55916
Sea Trout	282TJ06-T	2014-09-10	1.056	2.852	3.741	-26.3464	8.98686	41.4139	11.5851	3.57476
Sea Trout	282TJ06-M	2014-09-10	1.035	1.861	2.687	-24.2537	7.33776	27.2281	8.50317	3.20211
Sea Trout	282TJ06-B	2014-09-10	1.015	1.595	2.003	-25.1029	6.69771	23.812	6.51829	3.65311
Sea Trout	269TJ06-T	2014-09-10	1.036	2.504	3.375	-31.5729	8.32635	36.8336	10.6474	3.4594
Sea Trout	269TJ06-M	2014-09-10	1.222	2.51	3.254	-31.6634	7.74301	31.3098	8.71251	3.59366
Sea Trout	269TJ06-B	2014-09-10	1.106	1.8	2.289	-31.1764	7.32464	24.6665	6.8013	3.62674
Sea Trout	18TJ06-T	2014-09-10	0.762	1.912	2.541	-26.7721	10.841	38.1113	10.9769	3.47196
Sea Trout	18TJ06-M	2014-09-10	1.169	2.437	3.393	-26.3663	10.6352	31.724	9.47876	3.34685
Sea Trout	18TJ06-B	2014-09-10	1.147	2.02	2.88	-26.3898	10.1154	26.7056	8.24979	3.23712

## Sheet: HO
Species	Sample ID	Amount	Ampl 2	Ampl 28	d2H	d18O	%O	%H	O/H	Comment	area O	area H
Salmon	674TJ06TF	0.273	12.74	2.918	-159.271	5.31084	20.9799	4.56662	4.59418		82.213	56.882
Salmon	674TJ06TR	0.257	11.056	2.747	-155.69	4.60131	20.9643	4.19317	4.99963		77.366	49.169
Salmon	674TJ06MF	0.286	15.21	3.089	-185.704	6.29112	21.2524	5.17314	4.10821		87.216	67.505
Salmon	674TJ06MR	0.325	11.532	3.067	-146.641	3.71089	18.6898	3.46246	5.39785		87.159	51.343
Salmon	674TJ06BF	0.279	12.427	2.839	-174.644	5.36919	20.1405	4.34872	4.63136		80.667	55.358
Salmon	674TJ06BR	0.284	7.503	2.465	-119.075	3.23825	17.2543	2.617	6.59316		70.409	33.911
Salmon	638TY06TF	0.297	15.114	3.351	-183.247	6.86062	22.4726	4.93772	4.55122		95.722	66.911
Salmon	638TY06TR	0.266	10.726	2.795	-166.123	4.88606	21.0892	3.94322	5.34821		80.532	47.857
Salmon	638TY06MF	0.303	14.73	3.119	-192.771	6.24795	20.5338	4.74766	4.32503		89.264	65.635
Salmon	638TY06MR	0.274	10.272	2.785	-164.025	4.36908	20.3179	3.67807	5.52407		79.924	45.982
Salmon	638TY06BF	0.284	12.847	2.712	-204.144	5.1428	18.717	4.34002	4.31265		76.336	56.237
Salmon	638TY06BR	0.311	10.417	2.684	-178.513	3.69805	16.9348	3.26557	5.18588		75.638	46.338
Salmon	130TJ06TF	0.271	14.301	3.14	-177.352	6.6704	22.7859	5.12001	4.45036		88.597	63.307
Salmon	130TJ06TR	0.286	13.307	3.128	-168.591	5.9667	21.534	4.49043	4.79555		88.365	58.596
Salmon	130TJ06MF	0.246	12.052	2.727	-173.909	6.47084	21.7714	4.79622	4.53928		76.909	53.833
Salmon	130TJ06MR	0.294	10.396	2.949	-150.062	4.87322	22.2015	3.90095	5.69131		93.623	52.328
Salmon	130TJ06BF	0.235	12.574	2.772	-188.68	6.89213	26.7859	6.29112	4.25773		90.305	67.454
Salmon	130TJ06BR	0.27	7.812	2.364	-154.97	3.72256	19.1879	3.93188	4.88008		74.411	48.437
Salmon	140TJ06TF	0.255	11.383	2.932	-166.356	6.08106	24.9501	5.31334	4.69575		91.269	61.819
Salmon	140TJ06TR	0.279	12.171	3.072	-163.934	5.23265	23.3256	4.76008	4.90025		93.346	60.595
Salmon	140TJ06MF	0.292	13.785	3.126	-180.099	6.26312	22.037	4.94501	4.4564		92.304	65.882
Salmon	140TJ06MR	0.256	10.086	2.779	-158.404	4.71451	22.5506	4.07416	5.53502		82.861	47.588
Salmon	140TJ06BF	0.282	14.007	3.03	-190.954	5.71113	22.1284	5.04442	4.38671		89.528	64.905
Salmon	140TJ06BR	0.265	8.798	2.57	-147.166	3.6292	19.8505	3.41082	5.81984		75.548	41.24
Salmon	1261TJ06TF	0.254	11.798	2.952	-158.401	4.57213	23.3214	4.6738	4.98981		85.011	54.165
Salmon	1261TJ06TR	0.248	9.735	2.708	-147.326	3.76457	22.186	3.98279	5.57047		78.997	45.067
Salmon	1261TJ06MF	0.292	15.589	3.681	-163.519	5.07861	26.2	5	5.24		107.741	70.912
Salmon	1261TJ06MR	0.318	9.889	3.163	-129.611	3.33861	20.9037	2.94375	7.10105		93.68	45.467
Salmon	1261TJ06BF	0.295	14.969	3.448	-161.919	4.94557	24.0341	4.74154	5.06884		99.886	67.937
Salmon	1261TJ06BR	0.285	10.649	2.936	-151.345	4.02714	21.4169	3.54556	6.04048		86.06	49.079
Salmon	1216TJ06TF	0.252	12.756	3.216	-161.343	4.5628	26.4555	4.75197	5.56727		93.952	58.162
Salmon	1216TJ06TR	0.297	12.002	3.14	-153.908	3.45181	21.6991	3.83294	5.66122		90.838	55.291
Salmon	1216TJ06MF	0.285	13.828	3.309	-164.43	4.63398	24.1371	4.55015	5.30468		96.928	62.985
Salmon	1216TJ06MR	0.315	9.923	2.963	-136.806	2.87765	19.7764	2.98697	6.62089		87.823	45.699
Salmon	1216TJ06BF	0.291	16.22	3.271	-191.384	5.07744	22.7085	5.0551	4.49219		93.13	71.448
Salmon	1216TJ06BR	0.323	12.356	3.233	-161.65	3.96529	20.9028	3.60261	5.80213		95.141	56.518
Salmon	1230TJ06TF	0.268	13.122	3.265	-168.355	3.89411	24.6554	4.40886	5.59225		93.123	57.389
Salmon	1230TJ06TR	0.285	11.124	2.986	-160.219	2.52988	21.2965	3.63568	5.85764		85.579	50.326
Salmon	1230TJ06MF	0.277	11.591	2.961	-163.964	3.43081	22.1006	3.94434	5.60313		86.313	53.066
Salmon	1230TJ06MR	0.297	10.365	2.947	-149.49	2.94067	20.3175	3.23346	6.28351		85.085	46.643
Salmon	1230TJ06BF	0.299	14.31	3.272	-178.096	4.94441	22.6948	4.48303	5.06238		95.62	65.104
Salmon	1230TJ06BR	0.295	9.174	2.734	-145.637	3.31994	19.2719	2.96763	6.49403		80.191	42.52
Salmon	194TJ06TF	0.312	16.28	3.865	-173.99	5.35402	25.8139	4.87732	5.29264		113.398	73.91
Salmon	194TJ06TR	0.294	12.172	3.366	-155.59	3.64203	24.1877	3.89775	6.20556		100.182	55.658
Salmon	194TJ06MF	0.263	11.472	2.953	-164.698	3.9828	23.6558	4.1355	5.72019		87.709	52.826
Salmon	194TJ06MR	0.272	9.465	2.761	-152.312	3.20791	21.3792	3.32213	6.43537		82.013	43.889
Salmon	194TJ06BF	0.295	17.459	3.53	-201.141	6.24328	25.1512	5.56878	4.51646		104.505	79.79
Salmon	194TJ06BR	0.296	10.756	3.013	-160.679	3.29427	21.645	3.47035	6.23711		90.309	49.892
Salmon	128TJ06TF	0.261	13.615	3.285	-165.276	5.48356	26.4704	4.92884	5.37051		97.344	62.481
Salmon	128TJ06TR	0.275	13.256	3.286	-162.293	5.17897	25.2157	4.54229	5.55131		97.702	60.67
Salmon	128TJ06MF	0.297	13.967	3.293	-175.159	4.31773	22.8944	4.43616	5.16085		95.814	63.993
Salmon	128TJ06MR	0.301	10.005	2.939	-146.133	3.10171	20.7099	3.18763	6.49695		87.88	46.602
Salmon	128TJ06BF	0.298	10.945	2.857	-164.233	4.21036	20.1822	3.53308	5.71235		84.805	51.137
Salmon	128TJ06BR	0.297	9.042	2.667	-150.653	2.02107	18.5952	2.85272	6.5184		77.915	41.151
Salmon	1489TJ06TF	0.282	13.314	3.395	-166.238	4.42042	25.443	4.57859	5.55695		101.075	62.711
Salmon	1489TJ06TR	0.276	10.591	3.128	-148.906	2.93483	24.202	3.72816	6.49167		94.134	49.977
Salmon	1489TJ06MF	0.296	11.443	3.105	-159.659	3.51833	22.2629	3.74458	5.94537		92.873	53.835
Salmon	1489TJ06MR	0.29	10.38	3.087	-147.604	2.85664	22.9438	3.48006	6.59294		93.769	49.017
Salmon	1489TJ06BF	0.306	12.764	3.421	-158.377	4.05632	24.3158	4.07755	5.96334		104.8	60.602
Salmon	1489TJ06BR	0.272	8.991	2.722	-155.18	3.25226	22.1786	3.32834	6.66356		85.061	43.971
Salmon	1448TJ06TF	0.27	10.613	3.999	-156.817	4.01038	23.9577	4.7447
Salmon	1448TJ06TR	0.252	9.034	3.329	-149.614	2.71086	23.1323	4.35007
Salmon	1448TJ06MF	0.237	9.531	3.504	-165.396	3.31705	23.8146	4.90761
Salmon	1448TJ06MR	0.271	8.942	3.275	-157.181	1.19285	18.5829	3.857
Salmon	1448TJ06BF	0.251	10.621	3.973	-167.529	2.92429	24.016	5.14315
Salmon	1448TJ06BR	0.321	10.308	3.867	-156.119	2.04278	21.9344	3.87637
Salmon	1251TJ06TF	0.202	8.05	2.904	-158.39	3.21223	24.0272	4.84659
Salmon	1251TJ06TR	0.289	10.177	3.828	-150.334	2.86746	23.1827	4.26748
Salmon	1251TJ06MF	0.247	10.057	3.732	-164.403	4.17961	24.0532	4.94631
Salmon	1251TJ06MR	0.259	8.223	3.009	-142.492	2.64392	21.3368	3.90207
Salmon	1251TJ06BF	0.235	7.62	2.757	-143.036	2.91545	22.0805	3.97224
Salmon	1251TJ06BR	0.268	7.937	2.907	-134.087	3.18445	20.8981	3.61522
Salmon	1041TJ06TF	0.236	9.421	3.47	-161.814	4.02427	23.4672	4.84019
Salmon	1041TJ06TR	0.281	10.526	3.973	-152.624	3.51406	24.503	4.54911
Salmon	1041TJ06MF	0.258	9.444	3.487	-156.301	4.13162	24.3377	4.45022
Salmon	1041TJ06MR	0.253	7.769	2.797	-153.762	2.87756	21.684	3.78641
Salmon	1041TJ06BF	0.257	11.138	4.155	-179.891	4.49028	23.3295	5.25642
Salmon	1041TJ06BR	0.324	10.637	4.018	-154.885	2.83336	22.0643	3.97762
Salmon	506TJ06TF	0.235	10.371	3.881	-160.439	4.93483	26.4216	5.36394
Salmon	506TJ06TR	0.223	7.12	2.547	-145.972	1.75232	20.216	3.82341
Salmon	506TJ06MF	0.247	9.714	3.604	-155.73	3.18445	25.0123	4.78182
Salmon	506TJ06MR	0.255	6.099	2.167	-134.781	-0.298632	19.3942	3.16259
Salmon	506TJ06BF	0.301	12.436	4.794	-165.36	4.06595	24.0885	4.97748
Salmon	506TJ06BR	0.259	6.778	2.418	-143.638	1.22821	18.25	3.23449
Salmon	804TJ06TF	0.254	11.509	4.402	-156.664	4.8098	26.5643	5.52322
Salmon	804TJ06TR	0.245	9.526	3.523	-156.655	3.7136	22.8264	4.65199
Salmon	804TJ06MF	0.254	12.134	4.625	-176.902	4.85779	25.7012	5.7653
Salmon	804TJ06MR	0.25	8.374	3.06	-148.627	3.05058	22.6159	4.08497
Salmon	804TJ06BF	0.269	11.895	4.515	-176.191	4.95377	24.2133	5.34333
Salmon	804TJ06BR	0.293	9.59	3.527	-164.618	2.24737	19.3297	3.84141
Salmon	1355TJ06TF	0.235	10.267	3.836	-158.818	4.20613	24.7451	4.99173
Salmon	1355TJ06TR	0.253	9.233	3.398	-152.43	3.47365	21.5642	4.11908
Salmon	1355TJ06MF	0.277	12.378	4.755	-163.742	3.09983	22.3177	4.83216
Salmon	1355TJ06MR	0.296	9.656	3.603	-142.689	3.07205	20.5352	3.66983
Salmon	1355TJ06BF	0.294	14.937	5.899	-180.601	5.27455	23.5779	5.63568
Salmon	1355TJ06BR	0.274	7.768	2.81	-139.871	3.53806	18.37	3.20946
Salmon	1371TJ06TF	0.24	10.457	3.722	-167.933	2.81463	24.256	4.57317
Salmon	1371TJ06TR	0.242	10.35	3.659	-167.91	3.33545	24.6698	4.44524
Salmon	1371TJ06MF	0.268	11.659	4.173	-181.016	2.56333	22.3108	4.46082
Salmon	1371TJ06MR	0.282	9.278	3.284	-147.613	2.00752	21.8173	3.44766
Salmon	1371TJ06BF	0.306	13.147	4.849	-171.95	3.85354	23.6124	4.41337
Salmon	1371TJ06BR	0.338	12.389	4.567	-160.33	2.14273	21.9923	3.80003
Salmon	898TJ06TF	0.259	13.44	4.996	-168.89	4.94631	27.4444	5.38313
Salmon	898TJ06TR	0.282	11.665	4.234	-164.073	2.64703	23.3917	4.31241
Salmon	898TJ06MF	0.233	11.561	4.134	-180.305	4.43879	25.4673	5.12776
Salmon	898TJ06MR	0.28	10.26	3.66	-159.158	3.42168	22.5861	3.82149
Salmon	898TJ06BF	0.278	12.822	4.663	-183.314	4.46812	22.9005	4.77802
Salmon	898TJ06BR	0.289	8.786	3.056	-160.759	3.08072	19.13	3.1942
Salmon	898TJ06BR	0.276	9.135	3.179	-162.807	3.69039	20.5588	3.46833
Salmon	697TJ06TF	0.315	15.027	5.659	-159.017	4.62384	22.0986	4.84947
Salmon	697TJ06TR	0.359	15.862	6.108	-148.706	4.27466	22.4525	4.43183
Salmon	697TJ06MF	0.294	14.185	5.264	-165.063	4.41864	22.8447	4.93952
Salmon	697TJ06MR	0.339	12.411	4.559	-140.412	2.89608	20.9343	3.74045
Salmon	697TJ06BF	0.392	17.155	6.643	-167.199	4.23158	20.9749	4.42394
Salmon	697TJ06BR	0.369	14.873	5.592	-159.731	3.80984	20.7637	4.08544
Salmon	505TJ06T	0.253	12.079	4.634	-167.953	5.33011	28.4121	5.82564
Salmon	505TJ06M	0.232	9.737	3.575	-172.733	2.62751	25.0881	5.17342
Salmon	505TJ06B	0.262	7.737	2.754	-168.738	2.45828	19.195	3.61869
Salmon	413TJ06T	0.259	11.507	4.343	-175.757	4.88936	25.1002	5.2698
Salmon	413TJ06M	0.215	7.884	2.796	-174.583	3.18823	22.5118	4.38687
Salmon	413TJ06M	0.276	10.421	3.771	-173.146	3.57216	17.8432	3.38542
Salmon	413TJ06B	0.282	10.293	3.789	-177.309	2.4166	21.3014	4.15362
Salmon	1355TJ06T	0.281	13.242	5.146	-165.917	4.20866	23.6418	5.01254
Salmon	1355TJ06M	0.296	11.136	4.248	-144.364	3.3562	22.4685	4.08876
Salmon	1355TJ06B	0.297	8.588	3.137	-149.503	3.12762	18.2848	3.30867
Salmon	1487TJ06T	0.265	11.455	4.304	-166.398	3.312	22.4887	4.38273
Salmon	1487TJ06M	0.306	9.292	3.391	-153.959	1.67275	17.4535	3.05994
Salmon	1487TJ06B	0.307	9.189	3.342	-155.004	2.52269	17.4335	3.05608
Salmon	518TJ06T	0.248	13.075	4.963	-173.103	6.03102	22.4608	4.97404
Salmon	518TJ06M	0.337	11.277	4.175	-149.964	3.23496	16.1378	2.84791
Salmon	518TJ06M	0.276	9.368	3.325	-164.16	3.28674	15.4384	2.90229
Salmon	1409TJ06T	0.267	13.681	5.191	-168.216	4.63678	20.2748	4.32042
Salmon	1409TJ06M	0.253	11.002	4.043	-154.273	3.76285	19.2792	3.70392
Salmon	1409TJ06B	0.3	10.64	3.896	-151.724	2.3383	15.7438	3.00299
Salmon	518TJ06TF	0.246	10.826	3.921	-168.019	4.04574	17.2027	3.61339
Salmon	518TJ06TR	0.264	11.45	4.205	-162.74	3.62772	19.1838	3.64222
Salmon	518TJ06MF	0.268	12.439	4.645	-161.691	4.34253	19.67	3.8926
Salmon	518TJ06MR	0.261	8.714	3.099	-148.794	3.32336	16.3568	2.85286
Salmon	518TJ06MR	0.267	10.22	3.665	-168.754	4.0508	16.8603	3.26715
Salmon	518TJ06BF	0.326	12.624	4.709	-170.162	4.34631	16.5741	3.26423
Salmon	518TJ06BR	0.302	9.864	3.507	-170.283	2.72475	14.2345	2.69591
Salmon	1095TJ06T	0.247	11.174	4.108	-160.068	4.97398	18.8782	3.83458
Salmon	1095TJ06M	0.307	12.054	4.523	-146.66	4.60268	18.1641	3.32354
Salmon	1095TJ06B	0.286	10.293	3.742	-152.95	3.92577	16.2469	3.05459
Salmon	1255TJ06T	0.283	14.165	5.449	-163.921	4.84519	26.7206	5.20638
Salmon	1255TJ06M	0.288	12.701	4.744	-171.421	3.49807	23.7761	4.58155
Salmon	1255TJ06B	0.294	11.61	4.259	-168.97	3.32035	21.2909	4.11589
Salmon	1371TJ06T	0.254	13.164	4.842	-174.93	4.06437	25.2832	5.34271
Salmon	1371TJ06T	0.261	11.488	4.129	-170.895	4.15808	24.5378	4.57685
Salmon	1371TJ06M	0.268	10.688	3.797	-169.077	2.27731	21.7712	4.16174
Salmon	1371TJ06B	0.277	11.061	3.961	-169.764	1.68664	22.7532	4.14889
Salmon	898TJ06T	0.283	15.623	6.012	-167.135	5.27097	28.4134	5.66206
Salmon	898TJ06M	0.23	11.401	4.08	-175.141	4.45032	27.1133	5.1342
Salmon	898TJ06B	0.305	11.479	4.126	-170.822	2.80558	21.3737	3.91277
Salmon	983TJ06T	0.244	11.733	4.294	-148.531	4.77428	25.6924	4.80182		LE
Salmon	983TJ06M	0.242	8.063	2.804	-139.809	2.22857	21.1947	3.41329		LE
Salmon	983TJ06B	0.285	11.893	4.418	-138.065	3.46533	25.9525	4.31867		LE
Salmon	933TJ06T	0.237	11.365	4.142	-154.306	5.91188	26.5111	4.90533		LE
Salmon	933TJ06M	0.233	10.551	3.815	-146.628	5.87238	26.5498	4.70732		LE
Salmon	933TJ06B	0.265	11.003	4.007	-149.069	4.97791	25.1688	4.34358		LE
Salmon	989TJ06T	0.306	14.701	5.636	-149.308	4.92618	27.5521	4.91773		LE
Salmon	989TJ06M	0.255	10.772	3.903	-147.296	4.30404	25.9357	4.38272		LE
Salmon	989TJ06B	0.313	10.989	3.991	-147.273	3.27991	22.0145	3.65595		LE
Salmon	902TJ06T	0.27	12.253	4.53	-151.514	5.09848	26.8933	4.69608		LE
Salmon	902TJ06M	0.264	9.284	3.296	-142.589	3.83186	22.8342	3.66615		LE
Salmon	902TJ06B	0.28	9.141	3.231	-141.454	3.27858	21.6383	3.39729		LE
Salmon	982TJ06T	0.256	12	4.416	-147.71	4.44518	25.9227	4.7351		LE
Salmon	982TJ06M	0.273	11.354	4.146	-146.774	3.75461	25.4107	4.29226		LE
Salmon	982TJ06B	0.264	8.246	2.883	-138.035	3.21188	20.7235	3.26631		LE
Salmon	993TJ06T	0.245	11.574	4.194	-161.201	4.9557	25.4617	4.68955		LE
Salmon	993TJ06M	0.241	10.231	3.654	-150.524	3.82551	25.8291	4.40852		LE
Salmon	993TJ06B	0.275	8.985	3.171	-141.238	2.98645	21.169	3.41553		LE
Salmon	943TJ06T	0.232	11.456	4.178	-148.83	4.95344	26.7827	5.08801		LE
Salmon	943TJ06M	0.282	10.796	3.928	-142.812	2.99106	23.0557	4.0521		LE
Salmon	943TJ06B	0.322	9.039	3.224	-133.553	2.14233	19.7577	3.01167		LE
Salmon	943TJ06B	0.265	8.879	3.141	-135.097	3.49213	22.0349	3.54352		LE
Salmon	1295TJ06T	0.259	12.716	4.735	-146.528	4.76233	28.4358	5.13067		LE
Salmon	1295TJ06M	0.243	9.931	3.56	-138.871	3.51935	25.2156	4.30234		LE
Salmon	1295TJ06B	0.263	6.959	2.39	-130.168	1.85403	18.1843	2.77075		LE
Salmon	1218TJ06T	0.272	12.833	4.752	-155.113	3.89385	26.1316	4.85644		LE
Salmon	1218TJ06M	0.224	8.473	2.945	-148.663	3.52761	23.6688	3.99039		LE
Salmon	1218TJ06B	0.292	8.974	3.16	-142.609	2.81641	20.4317	3.25978		LE
Salmon	1245TJ06T	0.241	9.472	3.375	-139.858	3.61056	23.4232	4.1406		LE
Salmon	1245TJ06M	0.255	8.532	3.001	-131.36	3.95192	21.7196	3.5435		LE
Salmon	1245TJ06B	0.277	8.086	2.841	-125.183	3.38116	20.7998	3.10227		LE
Salmon	1243TJ06T	0.27	15.788	6.146	-147.334	4.39891	33.5684	6.05565		LE
Salmon	1243TJ06M	0.257	9.784	3.502	-135.835	3.42252	24.1707	4.00631		LE
Salmon	1243TJ06B	0.316	10.376	3.764	-129.892	3.215	21.5668	3.46627		LE
Salmon	1285TJ06T	0.245	12.396	4.592	-148.845	4.75788	28.7908	5.30839		LE
Salmon	1285TJ06M	0.285	10.812	3.934	-138.487	4.01474	24.2985	3.98813		LE
Salmon	1285TJ06B	0.294	8.673	3.057	-132.525	2.41832	20.0771	3.13382		LE
Salmon	1275TJ06T	0.258	13.73	5.174	-153.433	5.12242	27.3856	5.56853		LE
Salmon	1275TJ06M	0.231	9.09	3.2	-141.816	3.9577	24.0646	4.1714		LE
Salmon	1275TJ06B	0.286	8.692	3.059	-135.423	2.21743	19.9821	3.2118		LE
Salmon	1275TJ06B	0.279	8.627	3.007	-138.121	3.49124	20.5912	3.31972		LE
Salmon	1299TJ06T	0.24	11.171	4.069	-139.77	4.77742	28.115	4.89009		LE
Salmon	1299TJ06M	0.272	9.799	3.521	-134.108	3.1476	23.1951	3.80413		LE
Salmon	1299TJ06B	0.307	9.393	3.352	-129.437	3.29058	20.7941	3.23616		LE
Salmon	1075TJ06T	0.231	10.67	3.854	-143.887	5.29687	27.0125	4.88207		LE
Salmon	1075TJ06M	0.3	10.817	3.95	-132.041	4.173	23.7565	3.83291		LE
Salmon	1075TJ06B	0.239	7.002	2.4	-130.508	3.9342	20.3972	3.15989		LE
Salmon	1091TJ06T	0.231	11.611	4.241	-146.414	5.3671	28.2646	5.30009		LE
Salmon	1091TJ06M	0.271	10.466	3.78	-138.799	4.19661	24.3654	4.12076		LE
Salmon	1091TJ06B	0.272	9.541	3.407	-134.65	3.55511	23.1456	3.73823		LE
Salmon	1093TJ06T	0.222	11.285	4.108	-140.675	5.24461	27.4737	5.31981		LE
Salmon	1093TJ06M	0.268	9.028	3.211	-126.459	3.22314	21.3738	3.5581		LE
Salmon	1093TJ06B	0.295	9.267	3.292	-132.578	3.02696	20.4112	3.25375		LE
Salmon	1065TJ06T	0.246	12.433	4.692	-150.739	6.15557	27.5887	5.25668		LE
Salmon	1065TJ06M	0.25	10.429	3.841	-138.303	4.44354	25.0444	4.35594		LE
Salmon	1065TJ06B	0.269	9.669	3.529	-133.379	2.71018	21.9591	3.75093		LE
Salmon	1087TJ06T	0.267	13.006	4.873	-154.951	4.92931	24.3287	4.86364		LE
Salmon	1087TJ06M	0.237	8.485	2.951	-153.154	2.49928	20.1303	3.4952		LE
Salmon	1087TJ06B	0.269	8.809	3.125	-139.582	2.71018	19.8136	3.30018		LE
Salmon	1087TJ06B	0.29	8.933	3.194	-137.719	2.93766	20.0319	3.1052		LE
Salmon	1017TJ06T	0.247	10.888	3.982	-145.17	4.72671	22.9889	4.38528		LE
Salmon	1017TJ06M	0.224	8.412	2.983	-130.342	4.00161	21.3796	3.80401		LE
Salmon	1017TJ06B	0.286	8.971	3.222	-125.433	3.28362	19.7503	3.17791		LE
Salmon	1405TJ06T	0.246	10.451	3.761	-151.957	4.12009	22.7644	4.15047		LE
Salmon	1405TJ06M	0.231	8.804	3.116	-141.926	4.52529	21.3438	3.75875		LE
Salmon	1405TJ06B	0.304	9.778	3.529	-138.714	2.70425	20.0403	3.23479		LE
Salmon	1486TJ06T	0.246	11.045	4.037	-149.562	5.67692	24.897	4.49862		LE
Salmon	1486TJ06M	0.246	8.99	3.189	-144.047	3.59167	21.2161	3.62587		LE
Salmon	1486TJ06B	0.286	9.971	3.619	-137.054	2.66871	20.7141	3.45501		LE
Salmon	1460TJ06T	0.23	9.936	3.553	-156.87	3.57863	24.0145	4.3009		LE
Salmon	1460TJ06M	0.244	9.057	3.2	-149.762	3.08457	21.6499	3.64567		LE
Salmon	1460TJ06B	0.281	9.937	3.576	-149.149	2.73387	20.6131	3.54661		LE
Salmon	1419TJ06T	0.193	8.388	2.952	-143.944	3.50518	25.0445	4.29461		LE
Salmon	1419TJ06M	0.273	10.335	3.753	-145.664	2.12133	21.8521	3.74671		LE
Salmon	1419TJ06B	0.3	9.1	3.274	-133.643	2.3891	20.4955	3.08187		LE
Salmon	1442TJ06T	0.241	12.289	4.596	-153.021	5.28949	27.96	5.12548		LE
Salmon	1442TJ06M	0.215	8.617	3.048	-144.462	4.09995	24.2836	4.07122		LE
Salmon	1442TJ06B	0.238	7.203	2.509	-134.669	2.91515	19.9099	3.09686		LE
Salmon	1442TJ06B	0.265	7.714	2.713	-138.205	2.95188	18.9975	2.96756		LE
Salmon	1428TJ06T	0.245	10.697	3.928	-142.632	4.07862	26.571	4.42641		LE
Salmon	1428TJ06M	0.245	8.717	3.103	-140.456	3.66986	22.6108	3.61399		LE
Salmon	1428TJ06B	0.295	9.43	3.387	-145.15	2.30734	19.7339	3.13619		LE
Salmon	1488TJ06T	0.265	10.505	3.877	-133.168	4.73144	25.6608	4.01989		LE
Salmon	1488TJ06M	0.306	11.296	4.2	-137.382	2.60354	21.9707	3.64601		LE
Salmon	1488TJ06B	0.271	11.435	4.269	-137.597	2.22915	26.9414	4.15493		LE
Salmon	1357TJ06T	0.24	10.432	3.834	-134.746	3.90919	25.4773	4.35667		LE
Salmon	1357TJ06M	0.264	9.387	3.419	-126.026	2.75283	21.8826	3.59813		LE
Salmon	1357TJ06B	0.307	9.616	3.511	-130.055	2.60236	20.2046	3.17852		LE
Salmon	1373TJ06T	0.264	12.548	4.715	-151.134	4.37837	25.7303	4.67879		LE
Salmon	1373TJ06M	0.276	11.024	4.102	-137.251	3.48859	24.7691	4.06596		LE
Salmon	1373TJ06B	0.303	8.875	3.21	-126.105	2.44834	20.2919	3.02925		LE
Salmon	1385TJ06T	0.247	11.717	4.379	-149.744	5.69113	27.5482	4.90035		LE
Salmon	1385TJ06M	0.248	9.806	3.584	-140.469	3.74332	23.3699	4.14726		LE
Salmon	1385TJ06B	0.291	8.877	3.186	-139.708	2.17228	19.2822	3.09206		LE
Salmon	1395TJ06T	0.245	10.069	3.67	-146.282	3.78005	24.7549	4.23757		LE
Salmon	1395TJ06M	0.269	9.625	3.486	-143.069	3.95896	22.23	3.74397		LE
Salmon	1395TJ06B	0.284	9.439	3.413	-141.231	3.40565	21.9801	3.47		LE
Trout	26TJ06_T	84	0.207	7.947	-164.523			75.62
Trout	26TJ06_M	85	0.425	10.759	-157.524			98.807
Trout	26TJ06_B	86	0.365	11.651	-160.876			106.08
Trout	37TJ06_T	87	0.223	8.929	-169.016			83.032
Trout	37TJ06_M	88	0.428	12.43	-151.086			115.138
Trout	37TJ06_B	89	0.355	9.642	-149.645			89.715
Trout	61TJ06_T	90	0.191	7.028	-179.923			69.094
Trout	61TJ06_M	91	0.412	9.66	-160.967			87.75
Trout	61TJ06_B	92	0.36	10.481	-173.798			99.247
Trout	75TJ06_T	11	0.404	12.468	-134.594			113.793
Trout	75TJ06_M	12	0.354	11.149	-138.765			99.768
Trout	75TJ06_B	10	0.228	8.697	-143.764			80.601
Trout	89TJ06_T	14	0.42	10.396	-143.947			94.59
Trout	89TJ06_M	15	0.358	10.487	-155.436			94.622
Trout	89TJ06_B	13	0.222	9.143	-175.806			82.856
Trout	106TJ06_T	16	0.21	8.343	-145.687			76.853
Trout	106TJ06_M	18	0.343	8.773	-135.132			103.694
Trout	106TJ06_B	17	0.4	12.339	-127.783			108.998
Trout	109TJ06_T	22	0.195	7.798	-161.052			71.798
Trout	109TJ06_M	23	0.388	9.939	-148.828			90.102
Trout	109TJ06_B	24	0.367	11.47	-157.184			104.279
Trout	231TJ06_T	25	0.215	8.39	-161.302			78.217
Trout	231TJ06_M	26	0.402	11.8	-141.111			105.958
Trout	231TJ06_B	34	0.345	10.613	-137.563			95.488
Trout	244TJ06_T	35	0.208	9.01	-180.442			82.749
Trout	244TJ06_M	36	0.424	11.025	-156.044			98.866
Trout	244TJ06_B	37	0.347	10.771	-165.061			95.603
Trout	273TJ06_T	40	0.213	8.47	-170.314			75.254
Trout	273TJ06_M	41	0.405	9.562	-153.897			88.188
Trout	273TJ06_B	42	0.372	11.469	-166.572			101.014
Salmon	176TJ06_T	43	0.28	8.406	-162.394			77.473
Salmon	176TJ06_M	44	0.317	9.641	-157.296			88.3
Salmon	176TJ06_B	45	0.309	9.373	-160.466			85.268
Salmon	1236TJ06_T	46	0.287	7.282	-146.202			68.304
Salmon	1236TJ06_M	47	0.301	7.818	-140.665			71.591
Salmon	1236TJ06_B	48	0.309	8.046	-148.013			77.571
Salmon	1264TJ06_T	49	0.319	8.846	-149.518			81.163
Salmon	1264TJ06_M	50	0.291	8.47	-155.679			79.8
Salmon	1264TJ06_B	57	0.29	7.578	-145.207			73.19
Salmon	1367TJ06_T	58	0.293	8.461	-155.379			78.082
Salmon	1367TJ06_M	59	0.322	8.779	-149.361			80.118
Salmon	1367TJ06_B	60	0.322	9.345	-157.386			86.648
Salmon	1381TJ06_T	61	0.323	8.124	-148.494			74.972
Salmon	1381TJ06_M	62	0.306	8.038	-147.533			73.072
Salmon	1381TJ06_B	63	0.3	7.99	-149.161			75.501
Salmon	56TJ06_T	11	0.218	9.748	-168.752			88.295
Salmon	56TJ06_M	12	0.427	11.277	-149.929			100.934
Salmon	56TJ06_B	13	0.357	12.038	-162.822			109.305
Salmon	67TJ06_T	14	0.197	7.416	-163.217			69.244
Salmon	67TJ06_M	15	0.408	9.893	-143.546			90.227
Salmon	67TJ06_B	16	0.343	11.04	-158.402			103.793
Salmon	595TJ06_T	17	0.22	8.116	-138.049			75.027
Salmon	595TJ06_M	18	0.415	9.041	-132.2			81.024
Salmon	595TJ06_B	19	0.349	10.483	-140.241			94.965
Salmon	632TJO6_T	23	0.213	8.343	-161.841			77.636
Salmon	632TJO6_M	24	0.401	10.736	-156.463			96.476
Salmon	632TJO6_B	25	0.355	10.781	-160.733			99.422
Salmon	645TJ06_T	26	0.208	7.414	-167.829			68.291
Salmon	645TJ06_M	27	0.419	11.629	-168.297			108.601
Salmon	645TJ06_B	35	0.38	10.15	-160.633			93.928
Salmon	514TJ06_T	36	0.216	8.366	-164.387			77.296
Salmon	514TJ06_M	37	0.391	8.81	-149.131			80.02
Salmon	514TJ06_B	38	0.356	10.077	-160.529			94.491
Salmon	593TJ06_T	39	0.206	8.053	-170.267			74.461
Salmon	593TJ06_M	41	0.417	9.791	-148.166			90.904
Salmon	593TJ06_B	42	0.352	11.327	-164.908			102.828
Salmon	285TJ06_T	43	0.219	8.354	-166.101			77.726
Salmon	285TJ06_M	44	0.402	8.723	-141.15			84.298
Salmon	285TJ06_B	45	0.342	10.933	-163.924			99.747
Salmon	575TJ06_T	46	0.195	7.519	-169.877			71.35
Salmon	575TJ06_M	47	0.424	11.138	-157.038			101.104
Salmon	575TJ06_B	48	0.35	11.061	-162.046			100.758
Salmon	218TJ06_T	49	0.226	8.504	-162.382			83.443
Salmon	218TJ06_M	50	0.405	10.528	-148.376			98.669
Salmon	218TJ06_B	51	0.346	10.878	-157.087			104.052
Salmon	207TJ06_T	58	0.209	7.256	-164.971			66.6
Salmon	207TJ06_M	59	0.397	8.5	-156.218			86.73
Salmon	207TJ06_B	60	0.339	10.37	-168.133			95.216
Salmon	1158TJ06_T	61	0.197	7.155	-164.815			69.089
Salmon	1158TJ06_M	62	0.413	11.342	-142.723			101.226
Salmon	1158TJ06_B	63	0.335	10.845	-153.78			98.82
Salmon	1182TJ06_T	64	0.196	8.017	-172.412			74.453
Salmon	1182TJ06_M	65	0.396	8.789	-136.349			83.199
Salmon	1182TJ06_B	66	0.361	10.3	-145.298			92.164
Salmon	1440TJ06_T	70	0.208	7.336	-166.593			71.035
Salmon	1440TJ06_M	71	0.414	8.532	-145.988			84.299
Salmon	1440TJ06_B	72	0.363	8.76	-146.51			89.731
Salmon	1464TJ06_T	73	0.227	8.863	-170.328			83.661
Salmon	1464TJ06_M	75	0.343	10.555	-161.085			96.356
Salmon	1464TJ06_B	74	0.207	4.763	-152.075			45.914
